# Supplementary material for: Anti-degradation gelatin films crosslinked by active ester based on cellulose
Source: Royal Society of Chemistry journal article supplement (doi:10.1039/c5ra04808g), 2015-01-01
Supplement: c5ra04808g1.pdf [file c5ra04808g1.pdf]

**Supporting information**

**Anti-degradable gelatin films crosslinked by active ester based on cellulose**

Chen Zhuang, Furong Tao, Yuezhi Cui\*

Shandong Provincial Key Laboratory of Fine Chemicals, Qilu University of Technology, Jinan  
250353, P.R. China.

Tel: +86 531 89631208; Fax: +86 531 89631760;

E-mail address: [yuezhicui@163.com](mailto:yuezhicui@163.com)

**Figure captions:**

**Fig. S1** The  $^1\text{H-NMR}$  spectra of EDTAD

**Fig. S2** The FTIR spectrum of EDTAD

**Fig. S3** The FTIR spectra of MCC, ME and MEN

**Fig. S4** TGA (1) and DSC (2) curves of MCC, ME and MEN

**Fig. S5** Photos of water contact angles of gelatin films

a Gel, b Gel-15%MEN, c Gel-25%MEN

**Fig. S6** Light transmission of films at selected wavelengths

(1) light transmission of different Gel-MEN films

(2) light transmission comparison of Gel-MEN and Gel/MCC films

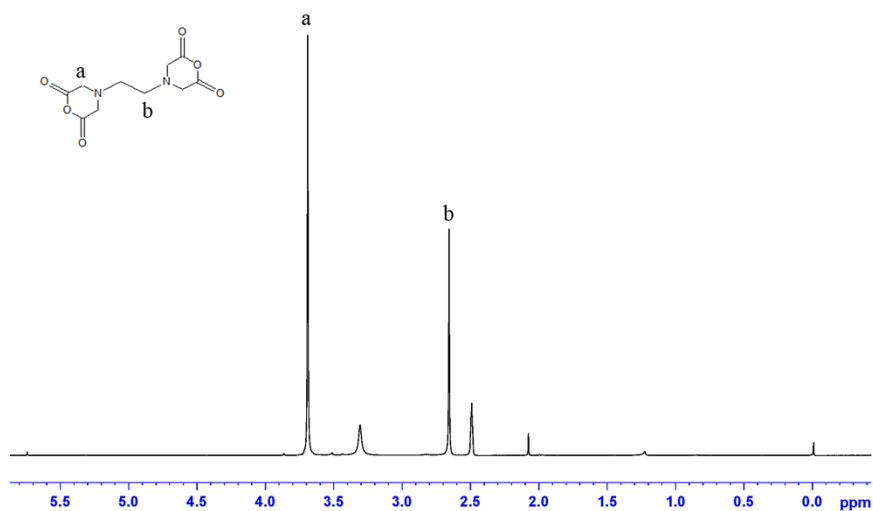

**Fig. S1** The <sup>1</sup>H-NMR spectrum of EDTAD

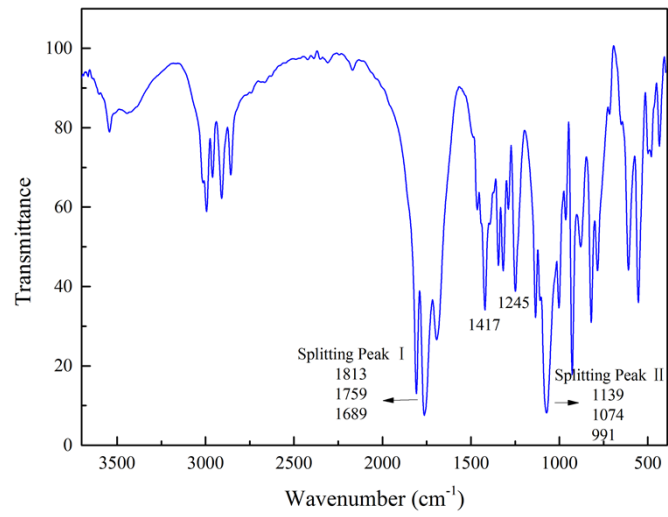

**Fig. S2** The FTIR spectra of EDTAD

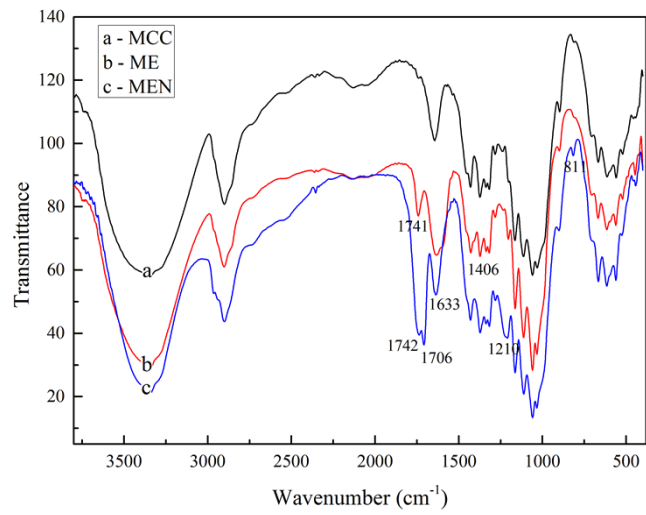

**Fig. S3** The FTIR spectra of MCC, ME and MEN

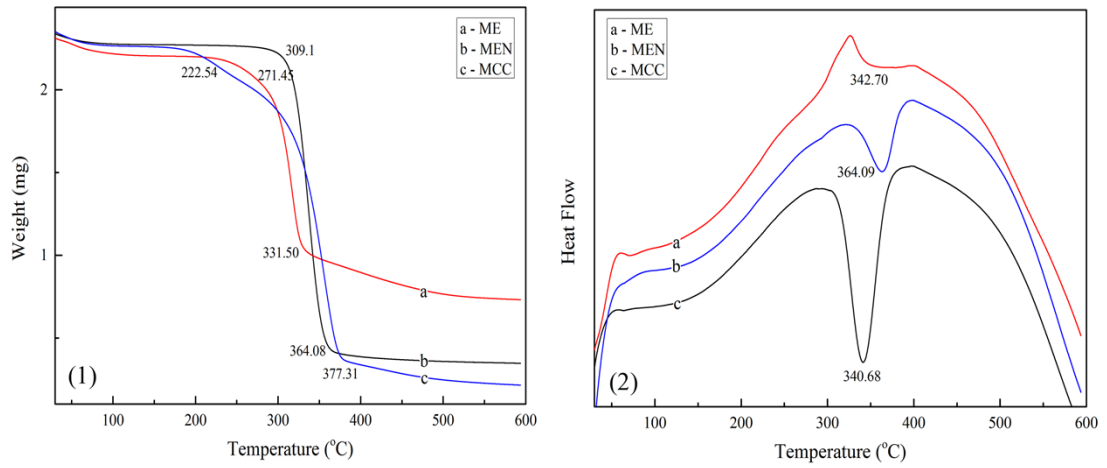

**Fig. S4** TGA (1) and DSC (2) curves of MCC, ME and MEN

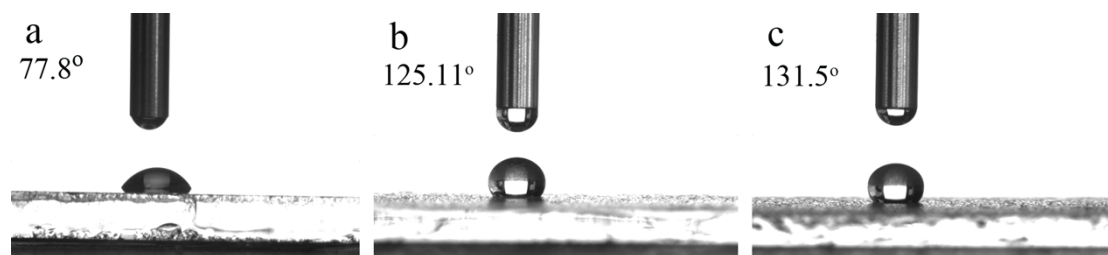

**Fig. S5** Photos of water contact angles of gelatin films

a Gel, b Gel-15%MEN, c Gel-25%MEN

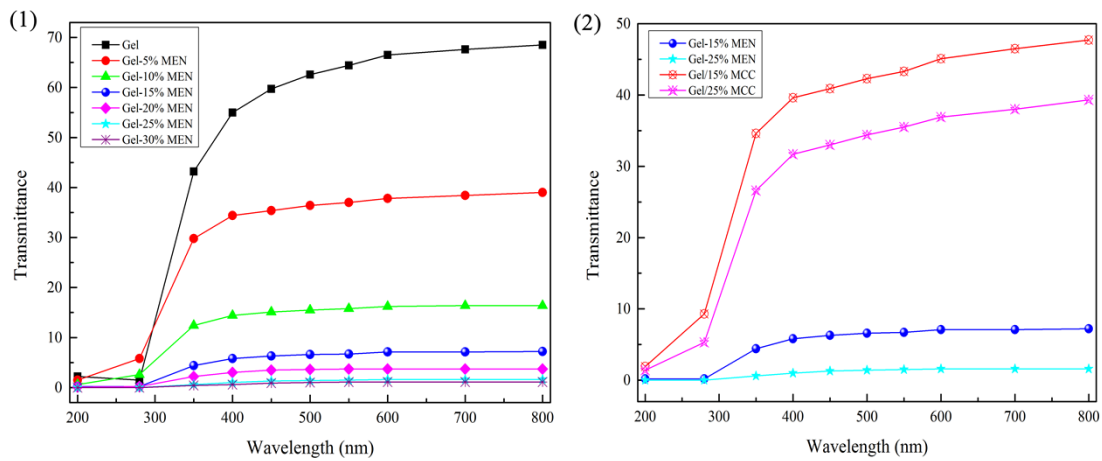

**Fig. S6** Light transmission of films at selected wavelengths

(1) light transmission of different Gel-MEN films

(2) light transmission comparison of Gel-MEN and Gel/MCC films
